# Supplementary material for: Improving urinary catheterisation practices in a rural hospital in Ontario
Source: PubMed Central journal article supplement — BMJ Open Qual. 2020 Feb 24;9(1):e000703. doi: 10.1136/bmjoq-2019-000703 (PMC7047472; doi:10.1136/bmjoq-2019-000703), 2020-02-24
Supplement: bmjoq-2019-000703supp001.pdf [file bmjoq-2019-000703supp001.pdf]

**Appendix A:****Cat Audit Tool**

Date Of audit \_\_\_\_\_

|             |
|-------------|
| Chart Label |
|-------------|

Physician's Order?    Yes    No

Date of Catheterization \_\_\_\_\_

Where was the Cath Inserted? \_\_\_\_\_

Patient Admitted with Catheter in Situ?

\_\_\_\_\_  
Yes    No

Reason(s) for Catheter

- Acute urinary obstruction
- Perioperative use in selected surgeries
- Assistance with healing of the stage III or IV Sacral wounds in incontinent patients
- Comfort for end of life patients
- ECU only; Accurate measurement of urinary output in critically ill patients (eg.,q1hr)
- Required immobilization for trauma or surgery patients
- Pre-admission permanent indwelling urinary catheter
- Continuous bladder irrigation (CBI) for gross hematuria
