# Supplementary material for: Improving urinary catheterisation practices in a rural hospital in Ontario
Source: PubMed Central journal article supplement — BMJ Open Qual. 2020 Feb 24;9(1):e000703. doi: 10.1136/bmjoq-2019-000703 (PMC7047472; doi:10.1136/bmjoq-2019-000703), 2020-02-24
Supplement: bmjoq-2019-000703supp004.pdf [file bmjoq-2019-000703supp004.pdf]

**Appendix D:**

|                                          |                                                                      |                         |
|------------------------------------------|----------------------------------------------------------------------|-------------------------|
| WINCHESTER DISTRICT<br>MEMORIAL HOSPITAL | MANUAL: Patient Care Services                                        | NUMBER:<br>IV-MED-M-210 |
|                                          | SECTION: IV – MED - Medical Directives                               |                         |
| MEDICAL DIRECTIVE                        | TOPIC: Medical Directive for Removal of Indwelling Urinary Catheters | DATE:                   |

**PURPOSE:**

To ensure early removal of indwelling urinary catheters.

**INCLUSION CRITERIA:**

All patients with an indwelling urinary catheter.

**EXCLUSION CRITERIA:**

- Acute urinary obstruction
- Perioperative use in selected surgeries
- Assistance with the healing of stage III or IV sacral wounds in incontinent patients
- Comfort for end of life patients
- Required immobilization for trauma or surgery patients
- Established permanent indwelling catheter
- Continuous bladder irrigation (CBI) for gross hematuria
- ECU only: Accurate measurement of urinary output in critically ill patients (e.g. q1h monitoring or strict ins/outs in severe hypernatremia)

**Authorized to perform Act:**

All Registered Nurses (RNs) and Registered Practical Nurses (RPNs)

**Specific Patient Criteria:** N/A

**DIRECTIVE:**

Nurse to assess patients with indwelling urinary catheters

If the patient doesn't meet the exclusion criteria, remove catheter and follow Choosing Wisely Canada algorithm.

Note - Nurses do not need to obtain a physician order to perform an in-out catheter as described in this algorithm.

**REFERENCES:**

www.catheterout.org  
Choosing Wisely Canada

ORIGINAL: July 2017

REVISED:

APPROVED:

\_\_\_\_\_  
Chief of Family Medicine Date

\_\_\_\_\_  
Senior VP, Clinical Services Date
